# Supplementary material for: INCIDENCE OF HERPES SIMPLEX VIRUS KERATITIS AND OTHER OCULAR DISEASE: GLOBAL REVIEW AND ESTIMATES
Source: PubMed Central journal article supplement (PMC9397127; doi:10.1080/09286586.2021.1962919), 2021-10-08
Supplement: IOPE_A_1962919_SM0362.pdf [file IOPE_A_1962919_SM0362.pdf]

# Annex: Incidence of herpes simplex virus keratitis and other ocular disease: systematic review and global estimates

Mr Ian McCormick, MSc, Dr Charlotte James, PhD, Professor Nicky J. Welton, PhD, Professor Philippe Mayaud, Dr Katherine M. E. Turner, PhD, Dr Sami L. Gottlieb, MD, Professor Allen Foster, and Dr Katharine J. Looker, PhD

## Further methods

**Box A1.** Medline search terms used in the literature search. Equivalent search terms used in Embase search.

1. exp keratitis, herpetic/ or exp keratitis, dendritic/
2. ((herpe\* or simplex or hsv\*) adj4 (blephar\* or conjunctiv\* or keratoconjunctiv\* or cornea\* or kerati\* or dendr\* or epithel\* or endothel\* or stroma\* or disciform or uveiti\* or panuveiti\* or retiniti\* or retinopath\* or necroti\* or arn or porn or nonnecroti\* or ocular or eye\*)).tw.
3. exp Uveitis/ or Iridocyclitis/ or exp Retinitis/ or Retinal Necrosis Syndrome, Acute/ or exp Keratitis/ or exp Keratoconjunctivitis/ or exp CONJUNCTIVITIS/ or exp BLEPHARITIS/
4. (herpe\* or simplex or hsv\*).tw.
5. 3 and 4
6. 1 or 2 or 5
7. Incidence/ or inciden\*.tw.
8. Prevalence/ or prevalen\*.tw.
9. epidemiolog\*.tw.
10. natural history.tw.
11. longitudinal\*.ab,ti.
12. prospective\*.ab,ti.
13. cohort\*.ab,ti.
14. (follow up or follow\*up or follow\* up).ab,ti
15. trial.ab,ti.
16. RCT\*.ab,ti.
17. time to event.ab,ti.
18. burden.tw.
19. rate.tw.
20. (length or duration).tw.
21. episode.tw.
22. recur\*.tw.
23. or/7-22
24. 6 and 23
25. exp animals/ not humans.sh.
26. 24 not 25
27. limit 26 to English language

## Further results

**Table A1.** Incidence data identified in the literature search, by study (listed in order of earliest to latest data collection period).

| Author name<br>(Year published)   | Study country<br>(Study years) | Population;<br>denominator (N)                                                                                                | Study design                                                    | Strengths                                                                                                                                                                               | Limitations                                                                                                                              | Age of<br>HSV cases<br>(ave;<br>range) | HSV clinical entity       |               | No. of<br>HSV<br>cases | Incidence<br>(95%CI) (cases<br>per 100,000<br>person-years) | Meets<br>quality<br>criteria? |                     |   |
|-----------------------------------|--------------------------------|-------------------------------------------------------------------------------------------------------------------------------|-----------------------------------------------------------------|-----------------------------------------------------------------------------------------------------------------------------------------------------------------------------------------|------------------------------------------------------------------------------------------------------------------------------------------|----------------------------------------|---------------------------|---------------|------------------------|-------------------------------------------------------------|-------------------------------|---------------------|---|
|                                   |                                |                                                                                                                               |                                                                 |                                                                                                                                                                                         |                                                                                                                                          |                                        |                           |               |                        |                                                             |                               |                     |   |
| Liesegang<br>(1989) <sup>28</sup> | USA<br>(1950-<br>1982)         | All residents of<br>Rochester, Olmstead<br>County, MN<br>("predominantly white,<br>middle-class"); N not<br>reported          | Retrospective<br>review of<br>medical records<br>linkage system | Well-defined denominator<br>population; case ascertainment<br>from outpatient and inpatient<br>records of all local care<br>providers; 33 year review<br>period; clear case definitions | No lab confirmation of<br>HSV in most cases;<br>reliance on accuracy of<br>medical records; non-<br>diverse study population             | Mean 37.1<br>at first<br>episode       | Any HSV<br>ocular disease | New           | 122                    | 8.4 (6.9-9.9)                                               | Y                             |                     |   |
|                                   |                                |                                                                                                                               |                                                                 |                                                                                                                                                                                         |                                                                                                                                          |                                        |                           | Recurrent     | 172 <sup>d</sup>       |                                                             |                               |                     |   |
|                                   |                                |                                                                                                                               |                                                                 |                                                                                                                                                                                         |                                                                                                                                          |                                        |                           | All           | 294 <sup>d</sup>       |                                                             |                               | 20.7 (18.3-23.1)    |   |
|                                   |                                |                                                                                                                               |                                                                 |                                                                                                                                                                                         |                                                                                                                                          |                                        |                           | Any keratitis | New                    | 84 <sup>a</sup>                                             | 6.2 <sup>c</sup>              |                     | Y |
|                                   |                                |                                                                                                                               |                                                                 |                                                                                                                                                                                         |                                                                                                                                          |                                        |                           |               | Recurrent              | 164 <sup>d</sup>                                            |                               |                     |   |
|                                   |                                |                                                                                                                               |                                                                 |                                                                                                                                                                                         |                                                                                                                                          |                                        |                           |               | All                    | 248 <sup>d</sup>                                            |                               | 12.0 <sup>e,f</sup> |   |
| Epithelial<br>keratitis           | New                            | 77 <sup>a</sup>                                                                                                               | 5.6                                                             | Y                                                                                                                                                                                       |                                                                                                                                          |                                        |                           |               |                        |                                                             |                               |                     |   |
|                                   | Recurrent                      | 135 <sup>d</sup>                                                                                                              |                                                                 |                                                                                                                                                                                         |                                                                                                                                          |                                        |                           |               |                        |                                                             |                               |                     |   |
|                                   | All                            | 212 <sup>d</sup>                                                                                                              |                                                                 |                                                                                                                                                                                         | 10.0 <sup>f</sup>                                                                                                                        |                                        |                           |               |                        |                                                             |                               |                     |   |
| Stromal<br>keratitis              | New                            | 7 <sup>a</sup>                                                                                                                | 0.6                                                             | Y                                                                                                                                                                                       |                                                                                                                                          |                                        |                           |               |                        |                                                             |                               |                     |   |
|                                   | Recurrent                      | 29 <sup>d</sup>                                                                                                               |                                                                 |                                                                                                                                                                                         |                                                                                                                                          |                                        |                           |               |                        |                                                             |                               |                     |   |
|                                   | All                            | 36 <sup>d</sup>                                                                                                               |                                                                 |                                                                                                                                                                                         | 2.0 <sup>f</sup>                                                                                                                         |                                        |                           |               |                        |                                                             |                               |                     |   |
| Uveitis                           | New                            | 5 <sup>a</sup>                                                                                                                | 0.4                                                             | Y                                                                                                                                                                                       |                                                                                                                                          |                                        |                           |               |                        |                                                             |                               |                     |   |
|                                   | Recurrent                      | 20 <sup>d</sup>                                                                                                               |                                                                 |                                                                                                                                                                                         |                                                                                                                                          |                                        |                           |               |                        |                                                             |                               |                     |   |
|                                   | All                            | 25 <sup>d</sup>                                                                                                               |                                                                 |                                                                                                                                                                                         | 1.5 <sup>f</sup>                                                                                                                         |                                        |                           |               |                        |                                                             |                               |                     |   |
| Blepharo-<br>conjunctivitis       | New                            | 66 <sup>a</sup>                                                                                                               | 4.2                                                             | Y                                                                                                                                                                                       |                                                                                                                                          |                                        |                           |               |                        |                                                             |                               |                     |   |
|                                   | Recurrent                      | 54 <sup>d</sup>                                                                                                               |                                                                 |                                                                                                                                                                                         |                                                                                                                                          |                                        |                           |               |                        |                                                             |                               |                     |   |
|                                   | All                            | 120 <sup>d</sup>                                                                                                              |                                                                 |                                                                                                                                                                                         | 3.5 <sup>f</sup>                                                                                                                         |                                        |                           |               |                        |                                                             |                               |                     |   |
|                                   | All                            |                                                                                                                               | 7.7                                                             | Y                                                                                                                                                                                       |                                                                                                                                          |                                        |                           |               |                        |                                                             |                               |                     |   |
|                                   |                                |                                                                                                                               |                                                                 |                                                                                                                                                                                         |                                                                                                                                          |                                        |                           |               |                        |                                                             |                               |                     |   |
| Norn (1970) <sup>11</sup>         | Denmark<br>(1958-<br>1964)     | Copenhagen; N =<br>approx. 700,000                                                                                            | Retrospective<br>review of single<br>hospital case<br>series    | 7 year review period                                                                                                                                                                    | No lab confirmation of<br>HSV; single hospital case<br>ascertainment; limited<br>description of methods and<br>results                   | Unknown                                | Epithelial<br>keratitis   | All           | 157                    | 5.9 <sup>e</sup>                                            | N                             |                     |   |
| Whitcher<br>(1976) <sup>29</sup>  | Tunisia<br>(1972-<br>1973)     | Patients attending<br>l'Institut<br>d'Ophthalmologie de<br>Tunis (national eye<br>hospital in Tunisia); N =<br>"five million" | Prospective<br>hospital-based<br>case series                    | Prospective 1 year study<br>period; clear case definitions                                                                                                                              | Virus isolation HSV<br>confirmation only; case<br>ascertainment<br>acknowledged as<br>insufficient for defined<br>denominator population | Unknown                                | Epithelial<br>keratitis   | All           | 48                     | 1.4                                                         | N                             |                     |   |
| Mortensen<br>(1979) <sup>30</sup> | Denmark<br>(1976-<br>1978)     | Funen county; N =<br>446,223                                                                                                  | Prospective<br>multiple clinic-<br>based case<br>series         | Prospective 2 year study<br>period; well-defined<br>denominator population; case<br>ascertainment from community<br>ophthalmologists                                                    | No lab confirmation of<br>HSV; limited description<br>of methods                                                                         | Mean 46.5;<br>range 4-84               | Epithelial<br>keratitis   | All           | 107                    | 12.0                                                        | Y                             |                     |   |
| Ribaric<br>(1976) <sup>31</sup>   | Croatia                        | Rijeka region; N =<br>800,000                                                                                                 | Retrospective<br>review of                                      | 18 year review period                                                                                                                                                                   | No lab confirmation of<br>HSV; denominator                                                                                               | Unknown                                | Any keratitis             | All           | 584                    | 4.1                                                         | N                             |                     |   |

|                                          |                           |                                                                                                                                                       |                                                        |                                                                                                                                                                                                                                                         |                                                                                                                                                          |                                                          |                        |                                            |                                       |                                                                              |                  |
|------------------------------------------|---------------------------|-------------------------------------------------------------------------------------------------------------------------------------------------------|--------------------------------------------------------|---------------------------------------------------------------------------------------------------------------------------------------------------------------------------------------------------------------------------------------------------------|----------------------------------------------------------------------------------------------------------------------------------------------------------|----------------------------------------------------------|------------------------|--------------------------------------------|---------------------------------------|------------------------------------------------------------------------------|------------------|
|                                          | (Not reported)            |                                                                                                                                                       | 'ambulatory and clinical' cases                        |                                                                                                                                                                                                                                                         | population not well-defined; case ascertainment not described; no case definition reported                                                               |                                                          |                        |                                            |                                       |                                                                              |                  |
| Young (2010) <sup>32</sup>               | USA (1976-2007)           | All residents of Olmstead County, MN; N not reported                                                                                                  | Retrospective review of medical records linkage system | Well-defined denominator population; case ascertainment from outpatient and inpatient records of all local care providers; 32 year review period; clear case definitions; excluded uncertain cases                                                      | No lab confirmation of HSV in most cases; reliance on accuracy of medical records; non-diverse study population                                          | Mean 43; range 1-91                                      | Any HSV ocular disease | New                                        | 394                                   | 11.8 (10.6-13.0)                                                             | Y                |
|                                          |                           |                                                                                                                                                       |                                                        |                                                                                                                                                                                                                                                         |                                                                                                                                                          |                                                          | Any keratitis          | New                                        | 297                                   | 9.2 (8.1-10.3)                                                               | Y                |
|                                          |                           |                                                                                                                                                       |                                                        |                                                                                                                                                                                                                                                         |                                                                                                                                                          |                                                          | Epithelial keratitis   | New                                        | 233                                   | 7.0 <sup>h</sup>                                                             | Y                |
|                                          |                           |                                                                                                                                                       |                                                        |                                                                                                                                                                                                                                                         |                                                                                                                                                          |                                                          | Stromal keratitis      | New                                        | 64                                    | 1.9 <sup>h,i</sup>                                                           | Y                |
|                                          |                           |                                                                                                                                                       |                                                        |                                                                                                                                                                                                                                                         |                                                                                                                                                          |                                                          | Uveitis                | New                                        | 2                                     | 0.060 <sup>h</sup>                                                           | Y                |
|                                          |                           |                                                                                                                                                       |                                                        |                                                                                                                                                                                                                                                         |                                                                                                                                                          |                                                          | Retinitis              | New                                        | 0                                     | 0 <sup>h,l</sup>                                                             | Y                |
| Blepharo-conjunctivitis                  | New                       | 79                                                                                                                                                    | 2.4 <sup>h</sup>                                       | Y                                                                                                                                                                                                                                                       |                                                                                                                                                          |                                                          |                        |                                            |                                       |                                                                              |                  |
| Paivonsalo-Hietanen (1997) <sup>33</sup> | Finland (1980-1982, 1988) | Out-patients and in-patients of Turku University Hospital Eye Clinic; hospital district for N = 457,842 (1980), N = 472,540 (1988)                    | Retrospective cohort, review of hospital records       | Well-defined denominator population for referral centre; 3 year and 1 year review periods                                                                                                                                                               | No lab confirmation of HSV; no case definition reported                                                                                                  | Unknown                                                  | Uveitis                | New                                        | 6                                     | 0.3 <sup>j</sup>                                                             | N                |
| Tran (1994) <sup>34</sup>                | Switzerland (1990-1993)   | New uveitis patients at Lausanne University eye clinic; referral centre for N = 600,000                                                               | Prospective hospital-based case series                 | Prospective 3 year study; clear case definition                                                                                                                                                                                                         | Serology HSV confirmation only; denominator population not clearly explained                                                                             | Mean 43; range 6-92                                      | Uveitis                | New                                        | 21                                    | 0.8 <sup>j</sup>                                                             | N                |
| Stanzel (2014) <sup>35</sup>             | USA (1998-1999)           | Nine Northern Californian communities: Oakland, Richmond, Walnut Creek, South San Francisco, Redwood City, Hayward, Fremont, Milpitas; N not reported | Retrospective review of health program medical records | Well-defined denominator populations selected to be representative of Northern California; case ascertainment from outpatient and inpatient records of all local care providers; 1 year review period; clear case definitions; excluded uncertain cases | No lab confirmation of HSV in most cases; reliance on accuracy of medical records/ ICD-9 coding                                                          | Mean 51.4; range 1-93                                    | Any HSV ocular disease | New<br>Recurrent<br>All                    | 71<br>59<br>130                       | 6.8 (5.3-8.6)<br>5.7 (4.3-7.3)<br>12.5 <sup>b</sup>                          | Y<br>Y<br>Y      |
| Muthiah (2007) <sup>15</sup>             | UK (2001-2002)            | National; N not reported                                                                                                                              | Prospective national surveillance reporting study      | Prospective 1 year study; well-defined denominator population; clear case definition; PCR confirmation                                                                                                                                                  | Case ascertainment via surveillance reporting system and follow-up questionnaire                                                                         | Mean 54.3; range 13-85                                   | Retinitis              | New                                        | 6                                     | Range 0.010-0.012 <sup>j,m</sup>                                             | Y                |
| Labetoulle (2005) <sup>36</sup>          | France (2002)             | National; N = 60,186,184                                                                                                                              | Prospective multicentre case series                    | Prospective study; case ascertainment across 412 ophthalmologists representative of gender, geography and practice type nationally; clear case definitions; incidence reported for all and highly probable cases separately                             | No lab confirmation of HSV; annual incidence extrapolated from a 3 month study period; participating ophthalmologists (412/1595 contacted) self-selected | For n=357:<br><20 = 4.5%<br>20-60 = 55.9%<br>60+ = 39.6% | Any keratitis          | New<br>Recurrent<br>All<br>Highly probable | 145<br>202<br>357 <sup>e</sup><br>292 | 13.2 (10.4-15.9)<br>18.3 (14.6-22.1)<br>31.5 (25.5-37.5)<br>25.8 (21.2-30.4) | Y<br>Y<br>Y<br>Y |
|                                          |                           |                                                                                                                                                       |                                                        |                                                                                                                                                                                                                                                         |                                                                                                                                                          |                                                          | Epithelial keratitis   | All                                        | 190                                   | 22.0 (18.7-25.4)                                                             | Y                |
|                                          |                           |                                                                                                                                                       |                                                        |                                                                                                                                                                                                                                                         |                                                                                                                                                          |                                                          | Stromal keratitis      | All                                        | 81                                    | 9.2 (7.0-11.3)                                                               | Y                |

|                                     |                      |                                                                                                                                                   |                                                   |                                                                                                        |                                                                                                                                                                                                                                                                                                                                                                                  |                                           |                        |                         |                                             |                    |             |
|-------------------------------------|----------------------|---------------------------------------------------------------------------------------------------------------------------------------------------|---------------------------------------------------|--------------------------------------------------------------------------------------------------------|----------------------------------------------------------------------------------------------------------------------------------------------------------------------------------------------------------------------------------------------------------------------------------------------------------------------------------------------------------------------------------|-------------------------------------------|------------------------|-------------------------|---------------------------------------------|--------------------|-------------|
| Cochrane (2012) <sup>16</sup>       | UK (2007-2008)       | National; N = 60,975,000                                                                                                                          | Prospective national surveillance reporting study | Prospective 1 year study; well-defined denominator population; clear case definition; PCR confirmation | Case ascertainment via surveillance reporting system and follow-up questionnaire                                                                                                                                                                                                                                                                                                 | Range 10-94                               | Retinitis              | New                     | 9                                           | 0.013 <sup>j</sup> | Y           |
| Adhin (2012) <sup>37</sup>          | Suriname (2008-2010) | Patients attending the ophthalmic department of Academic Hospital Paramaribo (only ophthalmic centre in Suriname); N = 524,143                    | Prospective hospital-based case series            | Prospective study; attempted to confirm HSV diagnoses with PCR                                         | Case ascertainment from single tertiary centre for national population; annual incidence calculated on first 2 months of the study only (n=37/91) as there was a drop in cases reported after this time; limited description of methods and results; incidence value determined including PCR-negative cases; no HSV detected in 50% cases clinically diagnosed as HSV keratitis | Median 41.5; range 0-88                   | Any HSV ocular disease | All                     | 37                                          | 11.4 (4.8-18.1)    | N           |
| Gómez-Mariscal (2020) <sup>38</sup> | Spain (2014-2017)    | Patients attending eye emergency service at Ramón y Cajal University Hospital, Eastern Madrid city & north eastern metropolitan area; N = 566,455 | Retrospective review of single hospital records   | Well-defined denominator population; 4 year review period                                              | No lab confirmation of HSV; no case definition reported                                                                                                                                                                                                                                                                                                                          | Mean 54.8; standard deviation ±18.1 years | Uveitis                | New<br>Recurrent<br>All | 60<br>41 <sup>d</sup><br>118 <sup>d,k</sup> | -<br>-<br>0.067    | N<br>N<br>N |

“Cases” refers to individuals except where stated. Incidence is annual incidence: incidences were adjusted to account for length of study. Some reported incidences do not exactly match incidence calculated from number of cases, denominator and length of study: reported incidence always used in preference over calculated incidence as it is assumed reported incidences are adjusted or otherwise corrected for some unknown factor. <sup>a</sup>Number of cases calculated from data reported in study. <sup>b</sup>Incidence estimate calculated by combining mutually exclusive incidences of new and recurrent disease. <sup>c</sup>Incidence estimate calculated by combining separate epithelial and stromal keratitis incidences to derive an any keratitis estimate. Assumption that any keratitis other than epithelial or stromal (e.g. disciform) is rare and contributes a negligible number of cases. <sup>d</sup>Incidence estimate based on number of episodes rather than individuals (i.e., individuals can be counted more than once). <sup>e</sup>Based on 287 episodes. <sup>f</sup>Incidence estimate calculated by subtracting incidence of new disease from incidence of all disease (new and recurrent combined). <sup>g</sup>10 cases missing data on classification of new or recurrent and 85 on keratitis form. <sup>h</sup>Estimated from no. of cases/no. of cases of any HSV ocular disease \* incidence of any HSV ocular disease. This method will not give the exact incidence, as reported incidences are age- and sex-adjusted. Number of cases of any HSV ocular disease also includes 16 cases of conjunctivitis alone, for which we did not calculate an incidence estimate. <sup>i</sup>Calculated by assuming number of cases of stromal keratitis equals no. of cases of any keratitis – no. of cases of epithelial keratitis. Assumption that any keratitis other than epithelial or stromal (e.g. disciform) is rare and contributes a negligible number of cases. However, the paper does state that there were 64 patients who presented with “other forms of keratitis [other than epithelial keratitis]”, which implies that these cases were not solely stromal keratitis cases. <sup>j</sup>Derived from (no. of HSV cases/no. of cases due to any cause) \* incidence due to any cause. Two incidence estimates given in paper; midpoint used for pooling. <sup>k</sup>Includes 17 episodes unclassified as either new or recurrent. <sup>l</sup>Non-zero values used for pooling (0.0001 cases; incidence 0.00001 per 100,000 person-years). <sup>m</sup>Two incidence estimates given in paper; midpoint used for pooling.

**Table A2.** Bias/quality assessment (based on the Newcastle-Ottawa scale), by clinical entity.

| Author name (Year published)    | Study country (Study years) | HSV clinical entity    |                 | No. of HSV cases | Incidence (95%CI) (cases per 100,000 person-years) | Quality assessment criteria |                                                     |                                                                         |                                                                                                                               |
|---------------------------------|-----------------------------|------------------------|-----------------|------------------|----------------------------------------------------|-----------------------------|-----------------------------------------------------|-------------------------------------------------------------------------|-------------------------------------------------------------------------------------------------------------------------------|
|                                 |                             |                        |                 |                  |                                                    | Are cases well defined?     | Is the study population (denominator) well defined? | Is the study designed to capture all cases within the study population? | Are the study cases and populations representative of a general population, without major selection, referral or design bias? |
| Liesegang (1989) <sup>28</sup>  | USA (1950-1982)             | Any HSV ocular disease | All             | 294              | 20.7 (18.3-23.1)                                   | *                           | *                                                   | *                                                                       | *                                                                                                                             |
| Stanzel (2014) <sup>35</sup>    | USA (1998-1999)             | Any HSV ocular disease | All             | 130              | 12.5                                               | *                           | *                                                   | *                                                                       | *                                                                                                                             |
| Adhin (2012) <sup>37</sup>      | Suriname (2008-2010)        | Any HSV ocular disease | All             | 37               | 11.4 (4.8-18.1)                                    | *                           | *                                                   | -                                                                       | -                                                                                                                             |
| Liesegang (1989) <sup>28</sup>  | USA (1950-1982)             | Any HSV ocular disease | New             | 122              | 8.4 (6.9-9.9)                                      | *                           | *                                                   | *                                                                       | *                                                                                                                             |
| Young (2010) <sup>32</sup>      | USA (1976-2007)             | Any HSV ocular disease | New             | 394              | 11.8 (10.6-13.0)                                   | *                           | *                                                   | *                                                                       | *                                                                                                                             |
| Stanzel (2014) <sup>35</sup>    | USA (1998-1999)             | Any HSV ocular disease | New             | 71               | 6.8 (5.3-8.6)                                      | *                           | *                                                   | *                                                                       | *                                                                                                                             |
| Liesegang (1989) <sup>28</sup>  | USA (1950-1982)             | Any HSV ocular disease | Recurrent       | 172              | 12.3                                               | *                           | *                                                   | *                                                                       | *                                                                                                                             |
| Stanzel (2014) <sup>35</sup>    | USA (1998-1999)             | Any HSV ocular disease | Recurrent       | 59               | 5.7 (4.3-7.3)                                      | *                           | *                                                   | *                                                                       | *                                                                                                                             |
| Liesegang (1989) <sup>28</sup>  | USA (1950-1982)             | Any keratitis          | All             | 248              | 18.2                                               | *                           | *                                                   | *                                                                       | *                                                                                                                             |
| Ribaric (1976) <sup>31</sup>    | Croatia (Not reported)      | Any keratitis          | All             | 584              | 4.1                                                | -                           | -                                                   | -                                                                       | -                                                                                                                             |
| Labetoulle (2005) <sup>36</sup> | France (2002)               | Any keratitis          | All             | 357              | 31.5 (25.5-37.5)                                   | *                           | *                                                   | *                                                                       | *                                                                                                                             |
| Liesegang (1989) <sup>28</sup>  | USA (1950-1982)             | Any keratitis          | New             | 84               | 6.2                                                | *                           | *                                                   | *                                                                       | *                                                                                                                             |
| Young (2010) <sup>32</sup>      | USA (1976-2007)             | Any keratitis          | New             | 297              | 9.2 (8.1-10.3)                                     | *                           | *                                                   | *                                                                       | *                                                                                                                             |
| Labetoulle (2005) <sup>36</sup> | France (2002)               | Any keratitis          | New             | 145              | 13.2 (10.4-15.9)                                   | *                           | *                                                   | *                                                                       | *                                                                                                                             |
| Liesegang (1989) <sup>28</sup>  | USA (1950-1982)             | Any keratitis          | Recurrent       | 164              | 12.0                                               | *                           | *                                                   | *                                                                       | *                                                                                                                             |
| Labetoulle (2005) <sup>36</sup> | France (2002)               | Any keratitis          | Recurrent       | 202              | 18.3 (14.6-22.1)                                   | *                           | *                                                   | *                                                                       | *                                                                                                                             |
| Labetoulle (2005) <sup>36</sup> | France (2002)               | Any keratitis          | Highly probable | 292              | 25.8 (21.2-30.4)                                   | *                           | *                                                   | *                                                                       | *                                                                                                                             |
| Liesegang (1989) <sup>28</sup>  | USA (1950-1982)             | Epithelial keratitis   | All             | 212              | 15.6                                               | *                           | *                                                   | *                                                                       | *                                                                                                                             |
| Norn (1970) <sup>11</sup>       | Denmark (1958-1964)         | Epithelial keratitis   | All             | 157              | 5.9                                                | *                           | *                                                   | -                                                                       | -                                                                                                                             |
| Whitcher (1976) <sup>29</sup>   | Tunisia (1972-1973)         | Epithelial keratitis   | All             | 48               | 1.4                                                | *                           | *                                                   | -                                                                       | -                                                                                                                             |
| Mortensen (1979) <sup>30</sup>  | Denmark (1976-1978)         | Epithelial keratitis   | All             | 107              | 12.0                                               | *                           | *                                                   | *                                                                       | *                                                                                                                             |
| Labetoulle (2005) <sup>36</sup> | France (2002)               | Epithelial keratitis   | All             | 190              | 22.0 (18.7-25.4)                                   | *                           | *                                                   | *                                                                       | *                                                                                                                             |
| Liesegang (1989) <sup>28</sup>  | USA (1950-1982)             | Epithelial keratitis   | New             | 77               | 5.6                                                | *                           | *                                                   | *                                                                       | *                                                                                                                             |

|                                          |                           |                         |           |     |                  |   |   |   |   |
|------------------------------------------|---------------------------|-------------------------|-----------|-----|------------------|---|---|---|---|
| Liesegang (1989) <sup>28</sup>           | USA (1950-1982)           | Epithelial keratitis    | Recurrent | 135 | 10.0             | * | * | * | * |
| Liesegang (1989) <sup>28</sup>           | USA (1950-1982)           | Stromal keratitis       | All       | 36  | 2.6              | * | * | * | * |
| Labetoulle (2005) <sup>36</sup>          | France (2002)             | Stromal keratitis       | All       | 81  | 9.2 (7.0-11.3)   | * | * | * | * |
| Liesegang (1989) <sup>28</sup>           | USA (1950-1982)           | Stromal keratitis       | New       | 7   | 0.6              | * | * | * | * |
| Liesegang (1989) <sup>28</sup>           | USA (1950-1982)           | Stromal keratitis       | Recurrent | 29  | 2.0              | * | * | * | * |
| Liesegang (1989) <sup>28</sup>           | USA (1950-1982)           | Uveitis                 | All       | 25  | 1.9              | * | * | * | * |
| Gómez-Mariscal (2020) <sup>38</sup>      | Spain (2014-2017)         | Uveitis                 | All       | 118 | 0.067            | - | * | - | * |
| Liesegang (1989) <sup>28</sup>           | USA (1950-1982)           | Uveitis                 | New       | 5   | 0.4              | * | * | * | * |
| Paivonsalo-Hietanen (1997) <sup>33</sup> | Finland (1980-1982, 1988) | Uveitis                 | New       | 6   | 0.3              | - | * | * | * |
| Tran (1994) <sup>34</sup>                | Switzerland (1990-1993)   | Uveitis                 | New       | 21  | 0.8              | * | - | - | - |
| Liesegang (1989) <sup>28</sup>           | USA (1950-1982)           | Uveitis                 | Recurrent | 20  | 1.5              | * | * | * | * |
| Muthiah (2007) <sup>15</sup>             | UK (2001-2002)            | Retinitis               | New       | 6   | Range 0.01-0.012 | * | * | * | * |
| Cochrane (2012) <sup>16</sup>            | UK (2007-2008)            | Retinitis               | New       | 9   | 0.013            | * | * | * | * |
| Liesegang (1989) <sup>28</sup>           | USA (1950-1982)           | Blepharo-conjunctivitis | All       | 120 | 7.7              | * | * | * | * |
| Liesegang (1989) <sup>28</sup>           | USA (1950-1982)           | Blepharo-conjunctivitis | New       | 66  | 4.2              | * | * | * | * |
| Liesegang (1989) <sup>28</sup>           | USA (1950-1982)           | Blepharo-conjunctivitis | Recurrent | 54  | 3.5              | * | * | * | * |

Studies not meeting the quality criteria are shown in grey. One estimate based on highly probable cases only also excluded from pooled estimates.

**Table A3.** Summary of unioocular vision impairment (World Health Organization threshold of mild or greater; any visual acuity <6/12) data identified in the literature search, by ocular HSV disease type and key study characteristics.

| Author name (Year published)   | Study country (Study years) | Population; N                                                                                                                        | Age of HSV cases (ave; range)                                          | HSV clinical entity            | Treatment                                                                    | No. of HSV cases (eyes) | % <6/12           | Length of follow-up |
|--------------------------------|-----------------------------|--------------------------------------------------------------------------------------------------------------------------------------|------------------------------------------------------------------------|--------------------------------|------------------------------------------------------------------------------|-------------------------|-------------------|---------------------|
| Liesegang (1989) <sup>28</sup> | USA (1950-1982)             | All residents of Rochester, Olmstead County, MN (“predominantly white, middle-class”); N NR                                          | Mean 37.1 at first episode                                             | Any ocular HSV disease         | Debridement, topical idoxuridine, vidarabine, trifluridine, topical steroids | 131                     | 22.1              | Mean 9 years        |
| Hodge (1997) <sup>39</sup>     | USA (1984-1994)             | HIV- individuals within catchment area of San Francisco General Hospital attending eye clinic for keratitis; N = 1800 and N = 48,200 | Mean 35.4 (HIV-)                                                       | All keratitis                  | Combinations of topical trifluridine, topical steroids and oral acyclovir    | 27 (HIV-)               | 48.0              | 12 months           |
| Claoue (1996) <sup>40</sup>    | UK (1994)                   | Patients presenting to 3 eye clinics over 1 week at Moorfields Eye Hospital, London; N = 229                                         | Range 21-90                                                            | Any ocular HSV disease         | NR                                                                           | 42                      | 40.0              | Not clear           |
| Bremner (1982) <sup>24</sup>   | Australia (1964-1979)       | Princess Margaret Hospital, Perth, W.A; children under 13 years; N NR                                                                | 43.4% < 4 years; 56.6% 4-12 years                                      | Epithelial keratitis           | NR                                                                           | 145                     | 18.6              | NR                  |
| Norm (1970) <sup>11</sup>      | Denmark (1958-1964)         | Copenhagen; N = approx. 700,000                                                                                                      | Unknown                                                                | Epithelial keratitis           | NR                                                                           | 56                      | 8.9               | NR                  |
|                                |                             |                                                                                                                                      |                                                                        | Stromal keratitis              | NR                                                                           | 51                      | 41.2              | NR                  |
| Wilhelmus (1981) <sup>12</sup> | UK (1979)                   | Patients who previously presented to Moorfields Eye Hospital, London in 1974; N = 152                                                | Unknown                                                                | Stromal keratitis <sup>3</sup> | NR                                                                           | 38                      | 23.7 <sup>2</sup> | 5 years             |
| Barron (1994) <sup>13</sup>    | USA (1989-1992)             | Patients at university eye clinics in San Francisco, New Orleans, Houston, Atlanta, Milwaukee, New York, Chicago, Philadelphia       | Mean 46; range 15-82<br>Mean 44; range 17-83                           | Stromal keratitis              | Topical prednisolone and trifluridine, oral acyclovir                        | 50                      | 42.0              | 6 months            |
|                                |                             |                                                                                                                                      |                                                                        |                                | Topical prednisolone and trifluridine                                        | 47                      | 27.7              |                     |
| Wilhelmus (1994) <sup>14</sup> | USA (1989-1992)             | Patients at university eye clinics in San Francisco, New Orleans, Houston, Atlanta, Milwaukee, New York, Chicago, Philadelphia       | Mean 47; range 16-81 <sup>1</sup><br>Mean 49; range 13-79 <sup>1</sup> | Stromal keratitis              | Trifluridine and topical steroid                                             | 52                      | 32.7              | 6 months            |
|                                |                             |                                                                                                                                      |                                                                        |                                | Trifluridine                                                                 | 42                      | 33.3              |                     |
| Rodriguez (1995) <sup>41</sup> | USA (Not reported)          | Patients at Massachusetts Eye & Ear Infirmary, Boston                                                                                | Mean 52.9; range 19-78                                                 | Uveitis                        | Topical prednisolone, oral acyclovir (long-term)                             | 13                      | 46.2              | Mean 5.9 years      |
|                                |                             |                                                                                                                                      |                                                                        |                                | Topical prednisolone, oral acyclovir (short-term)                            | 7                       | 85.7              |                     |

NR: not reported. <sup>1</sup>Age data at randomisation, not follow-up. <sup>2</sup>Percentage calculated indirectly from information in text. <sup>3</sup>Not entirely clear how much vision impairment attributable to stromal HSV keratitis.

## References

11. Norn, M.S., Dendritic (herpetic) keratitis. I. Incidence--seasonal variations--recurrence rate--visual impairment--therapy. *Acta Ophthalmol (Copenh)*. 1970; 48(1): 91-107.
12. Wilhelmus, K.R., Coster, D.J., and Donovan, H.C., Prognostic indicators of herpetic keratitis. Analysis of a five-year observation period after corneal ulceration. *Arch Ophthalmol*. 1981; 99(9): 1578-1582.
13. Barron, B.A., Gee, L., Hauck, W.W., et al., Herpetic Eye Disease Study. A controlled trial of oral acyclovir for herpes simplex stromal keratitis. *Ophthalmology*. 1994; 101(12): 1871-1882.
14. Wilhelmus, K.R., Gee, L., Hauck, W.W., et al., Herpetic Eye Disease Study. A controlled trial of topical corticosteroids for herpes simplex stromal keratitis. *Ophthalmology*. 1994; 101(12): 1883-1895.
15. Muthiah, M.N., Michaelides, M., Child, C.S., and Mitchell, S.M., Acute retinal necrosis: a national population-based study to assess the incidence, methods of diagnosis, treatment strategies and outcomes in the UK. *Br J Ophthalmol*. 2007; 91(11): 1452-1455.
16. Cochrane, T.F., Silvestri, G., McDowell, C., Foot, B., and McAvoy, C.E., Acute retinal necrosis in the United Kingdom: results of a prospective surveillance study. *Eye*. 2012; 26(3): 370-377.
24. Bremner, M.H., Ocular herpes simplex infections in children. *Aust J Ophthalmol*. 1982; 10(1): 27-29.
28. Liesegang, T.J., Melton, I.L.J., Daly, P.J., and Ilstrup, D.M., Epidemiology of ocular herpes simplex: Incidence in Rochester, Minn, 1950 through 1982. *Arch Ophthalmol*. 1989; 107(8): 1155-1159.
29. Whitcher, J.P., Dawson, C.R., Hoshiwara, I., et al., Herpes simplex keratitis in a developing country. Natural history and treatment of epithelial ulcers in Tunisia. *Arch Ophthalmol*. 1976; 94(4): 587-592.
30. Mortensen, K.K. and Sjolie, A.K., Keratitis dendritica. An epidemiological investigation. *Acta Ophthalmol (Copenh)*. 1979; 57(5): 750-754.
31. Ribaric, V., The incidence of herpetic keratitis among population. *Ophthalmologica*. 1976; 173(1): 19-22.
32. Young, R.C., Hodge, D.O., Liesegang, T.J., and Baratz, K.H., Incidence, recurrence, and outcomes of herpes simplex virus eye disease in Olmsted County, Minnesota, 1976-2007: the effect of oral antiviral prophylaxis. *Arch Ophthalmol*. 2010; 128(9): 1178-83.
33. Paivonsalo-Hietanen, T., Tuominen, J., Vaahtoranta-Lehtonen, H., and Saari, K.M., Incidence and prevalence of different uveitis entities in Finland. *Acta Ophthalmol Scand*. 1997; 75(1): 76-81.
34. Tran, V.T., Auer, C., Guex-Crosier, Y., Pittet, N., and Herbort, C.P., Epidemiological characteristics of uveitis in Switzerland. *Int Ophthalmol*. 1994; 18(5): 293-298.
35. Stanzel, T.P., Diaz, J.D., Mather, R., et al., The epidemiology of herpes simplex virus eye disease in Northern California. *Ophthalmic Epidemiol*. 2014; 21(6): 370-377.
36. Labetoulle, M., Auquier, P., Conrad, H., et al., Incidence of herpes simplex virus keratitis in France. *Ophthalmology*. 2005; 112(5): 888-895.
37. Adhin, M.R., Grunberg, M.G., Labadie-Bracho, M., and Pawiroedjo, J., Incidence of Alpha-Herpes virus induced ocular disease in Suriname. *J Med Virol*. 2012; 84(12): 1937-1942.
38. Gomez-Mariscal, M., De Arriba, F., Revenga, M., and Gonzalez-Lopez, J.J., Do Season and Environment Have a Role in the Incidence of Anterior Uveitis Attacks? *Ocul Immunol Inflamm*. 2020; 28(5): 786-790.
39. Hodge, W.G. and Margolis, T.P., Herpes simplex virus keratitis among patients who are positive or negative for human immunodeficiency virus: an epidemiologic study. *Ophthalmology*. 1997; 104(1): 120-124.



40. Claoue, C. and De Cock, R., The spectrum of herpes simplex virus disease of the anterior segment in the 1990s. *Acta Ophthalmol Scand.* 1996; 74(4): 407-410.
41. Rodriguez, A., Power, W.J., Neves, R.A., and Foster, C.S., Recurrence rate of herpetic uveitis in patients on long-term oral acyclovir. *Doc Ophthalmol.* 1995; 90(4): 331-340.
